# Supplementary material for: Gene specific effects on brain volume and cognition of TMEM106B in frontotemporal lobar degeneration
Source: bioRxiv or medRxiv preprint supplement (doi:10.1101/2024.04.05.24305253), 2024-04-05
Supplement: Supplementary file [file media-1.pdf]

## SUPPLEMENTARY DATA

### **Gene specific effects on brain volume and cognition of *TMEM106B* in frontotemporal lobar degeneration**

Marijne Vandebergh<sup>1,2</sup>, Eliana Marisa Ramos<sup>3</sup>, Nick Corriveau-Lecavalier<sup>4,5</sup>, Vijay K Ramanan<sup>4</sup>, John Kornak<sup>6</sup>, Carly Mester<sup>7</sup>, Tyler Kolander<sup>4</sup>, Danielle Brushaber<sup>7</sup>, Adam M Staffaroni<sup>8</sup>, Daniel Geschwind<sup>9</sup>, Amy Wolf<sup>8</sup>, Kejal Kantarci<sup>4</sup>, Tania F Gendron<sup>10</sup>, Leonard Petrucelli<sup>10</sup>, Marleen Van den Broeck<sup>1,2</sup>, Sarah Wynants<sup>1,2</sup>, Matthew C Baker<sup>10</sup>, Sergi Borrego – Écija<sup>11</sup>, Brian Appleby<sup>12</sup>, Sami Barmada<sup>13</sup>, Andrea Bozoki<sup>14</sup>, David Clark<sup>15</sup>, R Ryan Darby<sup>16</sup>, Bradford C Dickerson<sup>12</sup>, Kimiko Domoto-Reilly<sup>17</sup>, Julie A. Fields<sup>18</sup>, Douglas R. Galasko<sup>19</sup>, Nupur Ghoshal<sup>20</sup>, Neill Graff-Radford<sup>10</sup>, Ian M Grant<sup>21</sup>, Lawrence S Honig<sup>22</sup>, Ging-Yuek Robin Hsiung<sup>23</sup>, Edward D Huey<sup>24</sup>, David Irwin<sup>25</sup>, David S Knopman<sup>5</sup>, Justin Y Kwan<sup>26</sup>, Gabriel C Léger<sup>19</sup>, Irene Litvan<sup>19</sup>, Joseph C Masdeu<sup>27</sup>, Mario F Mendez<sup>3</sup>, Chiadi Onyike<sup>28</sup>, Belen Pascual<sup>27</sup>, Peter Pressman<sup>29</sup>, Aaron Ritter<sup>30</sup>, Erik D Roberson<sup>31</sup>, Allison Snyder<sup>26</sup>, Anna Campbell Sullivan<sup>32</sup>, M Carmela Tartaglia<sup>33</sup>, Dylan Wint<sup>30</sup>, Hilary W Heuer<sup>8</sup>, Leah K Forsberg<sup>5</sup>, Adam L Boxer<sup>8</sup>, Howard J Rosen<sup>8</sup>, Bradley F Boeve<sup>4</sup>, Rosa Rademakers<sup>1,2,10\*</sup> on behalf of the ALLFTD Consortium

1 VIB Center for Molecular Neurology, VIB, Antwerp, Belgium

2 Department of Biomedical Sciences, University of Antwerp, Antwerp, Belgium

3 Department of Neurology, David Geffen School of Medicine, University of California, Los Angeles, Los Angeles, CA, USA

4 Department of Neurology, Mayo Clinic, Rochester, MN, USA

5 Department of Psychiatry and Psychology, Mayo Clinic, Rochester, MN, USA.

6 Department of Epidemiology and Biostatistics, University of California, San Francisco, San Francisco, CA, USA

7 Department of Quantitative Health Sciences, Mayo Clinic, Rochester, MN, USA

8 Department of Neurology, Memory and Aging Center, University of California, San Francisco Weill Institute for Neurosciences San Francisco California USA.

9 Institute for Precision Health, Departments of Neurology, Psychiatry and Human Genetics at David Geffen School of Medicine, UCLA, Los Angeles CA USA

10 Department of Neuroscience, Mayo Clinic, Jacksonville, FL, USA

11 Alzheimer's Disease and Other Cognitive Disorders Unit, Neurology Service, Hospital Clínic de Barcelona, Institut d'Investigacions Biomèdiques August Pi i Sunyer (IDIBAPS), Fundació Clínic per a la Recerca Biomèdica, Universitat de Barcelona, Barcelona, Spain

- 12 Department of Neurology, Case Western Reserve University, Cleveland, OH, USA
- 13 Department of Neurology, University of Michigan, Ann Arbor, MI, USA
- 14 Department of Neurology, University of North Carolina, Chapel Hill, NC, USA
- 15 Department of Neurology, Indiana University, Indianapolis, IN, USA
- 16 Department of Neurology, Vanderbilt University, Nashville, TN, USA
- 17 Department of Neurology, University of Washington, Seattle, WA, USA
- 18 Department of Psychiatry and Psychology, Mayo Clinic, Rochester, MN, USA
- 19 Department of Neurosciences, University of California, San Diego, La Jolla, CA, USA
- 20 Departments of Neurology and Psychiatry, Washington University School of Medicine, Washington University, St. Louis, MO, USA
- 21 Department of Psychiatry and Behavioral Sciences, Northwestern Feinberg School of Medicine, Chicago, IL, USA
- 22 Taub Institute for Research on Alzheimer's Disease and the Aging Brain, College of Physicians and Surgeons, Columbia University, New York, NY, USA; Department of Neurology, Columbia University, New York, NY, USA
- 23 Division of Neurology, University of British Columbia, Vancouver, British Columbia, Canada
- 24 Department of Psychiatry and Human Behavior, Alpert Medical School of Brown University, Providence, Rhode Island, USA
- 25 Department of Neurology and Penn Frontotemporal Degeneration Center, Perelman School of Medicine, University of Pennsylvania
- 26 National Institute of Neurological Disorders and Stroke, National Institutes of Health, Bethesda, MD, USA
- 27 Department of Neurology, Houston Methodist, Houston, TX, USA
- 28 Department of Psychiatry and Behavioral Sciences, Johns Hopkins University, Baltimore, MD, USA
- 29 Department of Neurology, University of Colorado, Aurora, CO, USA
- 30 Cleveland Clinic Lou Ruvo Center for Brain Health, Las Vegas, NV, 89106, USA
- 31 Department of Neurology, University of Alabama at Birmingham, Birmingham, AL, USA
- 32 Glenn Biggs Institute for Alzheimer's & Neurodegenerative Diseases, UT Health San Antonio
- 33 Tanz Centre for Research in Neurodegenerative Diseases, Division of Neurology, University of Toronto, Toronto, Ontario, Canada

\*Corresponding author:

Rosa Rademakers, Ph.D. (ORCID: 0000-0002-4049-0863)

VIB Center for Molecular Neurology

Universiteitsplein 1, 2610 Wilrijk, Belgium

Phone: +32 3 265 95 95

E-mail: [rosa.rademakers@uantwerpen.vib.be](mailto:rosa.rademakers@uantwerpen.vib.be)

**eTable 1. Individual regions of interest (ROIs) for gray matter volumes. Left and right hemispheres were considered separately in analyses**

| <b>Cortical volumes</b>                                                      | <b>Subcortical volumes</b> | <b>Cerebellar volume</b> |
|------------------------------------------------------------------------------|----------------------------|--------------------------|
| Frontal lobe                                                                 | Hippocampus                | Cerebellum               |
| Temporal lobe                                                                | Amygdala                   |                          |
| Parietal lobe                                                                | Caudate                    |                          |
| Occipital lobe                                                               | Accumbens                  |                          |
| Cingulate cortices: rostral anterior,<br>caudal anterior, isthmus, posterior | Pallidum                   |                          |
| Insular cortices                                                             | Thalamus                   |                          |
|                                                                              | Putamen                    |                          |

**eTable 2. Demographic characteristics for participants included in the analyses with gray matter volume as outcome (N = 958)**

| <b>Characteristic</b>               | <b>All mutation carriers</b> | <b>C9orf72+</b> | <b>GRN+</b>   | <b>MAPT+</b> | <b>Non-carriers</b> |
|-------------------------------------|------------------------------|-----------------|---------------|--------------|---------------------|
| Sample size                         | 373                          | 169             | 82            | 106          | 585                 |
| Age at visit (yr), mean (s.d)       | 51.19 (14.14)                | 51.18 (13.97)   | 57.63 (13.25) | 46.7 (12.57) | 58.59 (13.79)       |
| Female, n (%)                       | 203 (54.42 %)                | 92 (54.44 %)    | 40 (48.78 %)  | 62 (58.49 %) | 299 (51.11 %)       |
| Education (yr), mean (s.d)          | 15.67 (2.48)                 | 15.75 (2.39)    | 15.72 (2.75)  | 15.54 (2.48) | 15.95 (2.50)        |
| <b>Race, n</b>                      |                              |                 |               |              |                     |
| EUR                                 | 361                          | 167             | 79            | 101          | 544                 |
| Non-EUR                             | 11                           | 1               | 3             | 5            | 34                  |
| Unknown                             | 1                            | 1               | 0             | 0            | 7                   |
| <b><i>TMEM106B</i> rs1990622, n</b> |                              |                 |               |              |                     |
| A/A                                 | 161                          | 71              | 42            | 42           | 204                 |
| A/G                                 | 161                          | 71              | 36            | 50           | 277                 |
| G/G                                 | 51                           | 27              | 4             | 14           | 104                 |
| <b>CDR@+NACC-FTLD Global, n</b>     |                              |                 |               |              |                     |
| 0                                   | 191                          | 92              | 44            | 47           | 235                 |
| 0.5                                 | 71                           | 38              | 11            | 19           | 83                  |

|                                                                             |                        |                        |                      |                       |                        |
|-----------------------------------------------------------------------------|------------------------|------------------------|----------------------|-----------------------|------------------------|
| $\geq 1$                                                                    | 111                    | 39                     | 27                   | 40                    | 267                    |
| <b>CDR®+NACC-FTLD sum of boxes, mean (s.d)</b>                              | 3.22 (5.11)            | 2.52 (4.40)            | 3.82 (5.65)          | 3.93 (5.70)           | 4.03 (4.88)            |
| <b>Primary clinical phenotype, n</b>                                        |                        |                        |                      |                       |                        |
| Clinically normal                                                           | 188                    | 91                     | 42                   | 48                    | 234                    |
| MBI/MCI                                                                     | 41                     | 19                     | 8                    | 14                    | 32                     |
| bvFTD                                                                       | 91                     | 35                     | 15                   | 38                    | 122                    |
| ALS                                                                         | 6                      | 6                      | 0                    | 0                     | 0                      |
| FTD-ALS                                                                     | 5                      | 4                      | 0                    | 0                     | 5                      |
| PPA                                                                         | 0                      | 3                      | 9                    | 0                     | 87                     |
| CBS                                                                         | 3                      | 0                      | 2                    | 1                     | 49                     |
| PSP                                                                         | 3                      | 0                      | 1                    | 2                     | 56                     |
| Other                                                                       | 21                     | 11                     | 5                    | 3                     | 0                      |
| <b>MoCA, mean (s.d.)</b>                                                    | 24.42 (6.29)<br>NA: 31 | 25.29 (5.22)<br>NA: 15 | 22.8 (7.87)<br>NA: 7 | 24.09 (6.71)<br>NA: 7 | 22.81 (6.91)<br>NA: 54 |
| <b>Total gray matter volume (% of total intracranial volume) mean (s.d)</b> | 41.91 (5.62)           | 41.69 (5.36)           | 40.68 (5.79)         | 42.87 (5.66)          | 41.70 (6.91)           |

**eTable 3. Demographic characteristics for participants included in the analyses with UDS3-EF as outcome (N =1581)**

| <b>Characteristic</b>               | <b>All mutation carriers</b> | <b>C9orf72+</b> | <b>GRN+</b>   | <b>MAPT+</b>  | <b>Non-carriers</b> |
|-------------------------------------|------------------------------|-----------------|---------------|---------------|---------------------|
| Sample size                         | 465                          | 229             | 101           | 113           | 1116                |
| Age at visit (yr), mean (s.d)       | 53.17 (14.24)                | 53.05 (14.19)   | 58.39 (12.97) | 48.44 (12.87) | 62.1 (12.47)        |
| Female, n (%)                       | 248 (53.33 %)                | 126 (55.02 %)   | 46 (45.54 %)  | 65 (57.52 %)  | 527 (47.22 %)       |
| Education (yr), mean (s.d)          | 15.55 (2.51)                 | 15.62 (2.39)    | 15.5 (2.89)   | 15.62 (2.42)  | 16.06 (2.61)        |
| <b>Race, n</b>                      |                              |                 |               |               |                     |
| EUR                                 | 448                          | 225             | 95            | 108           | 1021                |
| Non-EUR                             | 13                           | 1               | 5             | 5             | 79                  |
| Unknown                             | 4                            | 3               | 1             | 0             | 16                  |
| <b><i>TMEM106B</i> rs1990622, n</b> |                              |                 |               |               |                     |
| A/A                                 | 192                          | 90              | 49            | 44            | 348                 |
| A/G                                 | 212                          | 108             | 46            | 53            | 551                 |
| G/G                                 | 61                           | 31              | 6             | 16            | 217                 |
| <b>CDR®+NACC-FTLD Global, n</b>     |                              |                 |               |               |                     |
| 0                                   | 208                          | 108             | 43            | 47            | 279                 |
| 0.5                                 | 78                           | 41              | 14            | 20            | 181                 |

|                                                |                        |                        |                      |                       |                        |
|------------------------------------------------|------------------------|------------------------|----------------------|-----------------------|------------------------|
| ≥ 1                                            | 179                    | 80                     | 44                   | 46                    | 656                    |
| <b>CDR®+NACC-FTLD sum of boxes, mean (s.d)</b> | 4.08 (5.35)            | 3.78 (5.33)            | 4.93 (5.96)          | 3.89 (4.71)           | 5.27 (4.90)            |
| <b>Primary clinical phenotype, n</b>           |                        |                        |                      |                       |                        |
| Clinically normal                              | 202                    | 106                    | 42                   | 46                    | 277                    |
| MBI/MCI                                        | 46                     | 22                     | 9                    | 14                    | 56                     |
| bvFTD                                          | 144                    | 65                     | 28                   | 44                    | 285                    |
| ALS                                            | 10                     | 10                     | 0                    | 0                     | 0                      |
| FTD-ALS                                        | 11                     | 10                     | 0                    | 0                     | 19                     |
| PPA                                            | 15                     | 3                      | 8                    | 1                     | 204                    |
| CBS                                            | 9                      | 1                      | 6                    | 1                     | 108                    |
| PSP                                            | 4                      | 2                      | 1                    | 1                     | 167                    |
| Other                                          | 24                     | 10                     | 7                    | 6                     | 0                      |
| <b>MoCA, mean (s.d.)</b>                       | 22.66 (7.49)<br>NA: 21 | 23.39 (6.93)<br>NA: 13 | 20.8 (8.42)<br>NA: 4 | 22.76 (7.53)<br>NA: 4 | 21.09 (7.18)<br>NA: 60 |
| <b>USD3-EF (composite z-score) mean (s.d)</b>  | -0.65 (1.49)           | -0.59 (1.42)           | -0.97 (1.52)         | -0.49 (1.60)          | -1.29 (1.38)           |



**eTable 4. Number of individuals grouped by gene-affection status, included in the fitted linear mixed models to investigate the association between the gene-affection status on the outcome measures**

| Group | Description                | GM volume<br>N=942 | UDS3-EF<br>N = 1559 | ALSFRS-R<br>N = 1003 | UPDRS<br>N = 1087 |
|-------|----------------------------|--------------------|---------------------|----------------------|-------------------|
| 1     | Non-carrier & asymptomatic | 234                | 277                 | /                    | /                 |
| 2     | Non-carrier & symptomatic  | 351                | 839                 | 746                  | 838               |
| 3     | GRN & asymptomatic         | 42                 | 42                  | /                    | /                 |
| 4     | GRN & symptomatic          | 40                 | 59                  | 64                   | 59                |
| 5     | C9orf72 & asymptomatic     | 91                 | 106                 | /                    | /                 |
| 6     | C9orf72 & symptomatic      | 78                 | 123                 | 121                  | 119               |
| 7     | MAPT & asymptomatic        | 48                 | 46                  | /                    | /                 |
| 8     | MAPT & symptomatic         | 58                 | 67                  | 72                   | 71                |

**eTable 5. Linear mixed models were fitted to investigate the association between the gene-affection status on the gray matter and cognitive (UDS3-EF) outcome measures, adjusted for education, age, sex and CDR+NACC-FTLD sum of boxes score as fixed effects and pedigree as random effect.**

|                            | <i>Total gray matter volume</i><br><i>N = 942</i> |                                  | <i>UDS3-EF</i><br><i>N = 1559</i> |                                  |
|----------------------------|---------------------------------------------------|----------------------------------|-----------------------------------|----------------------------------|
|                            | <b>Coeff (95% CI)</b>                             | <b>P value</b>                   | <b>Coeff (95% CI)</b>             | <b>P value</b>                   |
| Non-mutation & symptomatic | -1.11 (-1.84,-0.37)                               | <b>0.003</b>                     | -1.27 (-1.42,-1.12)               | <b>&lt; 2 × 10<sup>-16</sup></b> |
| GRN & presymptomatic       | -0.65 (-1.74,0.44)                                | 0.245                            | -0.07 (-0.34, 0.21)               | 0.632                            |
| GRN & symptomatic          | -3.07 (-4.33,-1.89)                               | <b>8.98 × 10<sup>-7</sup></b>    | -1.22 (-1.47, -0.96)              | <b>&lt; 2 × 10<sup>-16</sup></b> |
| C9 & presymptomatic        | -1.99 (-2.80,-1.19)                               | <b>1.68 × 10<sup>-6</sup></b>    | -0.06 (-0.25, 0.12)               | 0.510                            |
| C9 & symptomatic           | -3.49 (-4.40,-2.58)                               | <b>1.77 × 10<sup>-13</sup></b>   | -0.98 (-1.17, -0.78)              | <b>&lt; 2 × 10<sup>-16</sup></b> |
| MAPT & presymptomatic      | -0.68 (-1.71,0.35)                                | 0.199                            | 0.19 (-0.07, 0.45)                | 0.158                            |
| MAPT & symptomatic         | -2.71 (-3.77,-1.68)                               | <b>4.72 × 10<sup>-7</sup></b>    | -1.04 (-1.27, -0.80)              | <b>&lt; 2 × 10<sup>-16</sup></b> |
| Education                  | 0.07 (-0.01,0.16)                                 | 0.110                            | 0.06 (0.04, 0.07)                 | <b>1.15 × 10<sup>-11</sup></b>   |
| Age at visit               | -0.18 (-0.20,-0.16)                               | <b>&lt; 2 × 10<sup>-16</sup></b> | -0.02 (-0.02, -0.01)              | <b>&lt; 2 × 10<sup>-16</sup></b> |
| Sex (female)               | 1.75 (1.32,2.16)                                  | <b>2.14 × 10<sup>-15</sup></b>   | -0.10 (-0.19, -0.02)              | <b>0.021</b>                     |
| CDR+NACC-FTLD SB           | -0.39 (-0.44,-0.33)                               | <b>&lt; 2 × 10<sup>-16</sup></b> | -0.11 (-0.13, -0.10)              | <b>&lt; 2 × 10<sup>-16</sup></b> |

**eTable 6. Linear mixed models were fitted with education, age, sex, genetic status (non-carrier vs carrier) and the CDR+NACC-FTLD sum of boxes as fixed effects and pedigree as random effect to investigate the association between *TMEM106B* rs1990622 and the outcome measures total gray matter volume and UDS3-EF.**

|                       | <i>Total gray matter volume (N = 958)</i> |                | <i>UDS3-EF (N = 1581)</i> |                |
|-----------------------|-------------------------------------------|----------------|---------------------------|----------------|
|                       | <b>Coeff (95% CI)</b>                     | <b>P value</b> | <b>Coeff (95% CI)</b>     | <b>P value</b> |
| TMEM106B<br>Additive  | -0.08 (-0.39,0.22)                        | 0.602          | -0.04 (-0.10, 0.03)       | 0.291          |
| TMEM106B<br>Recessive | -0.20 (-0.78,0.37)                        | 0.489          | -0.05 (-0.17,0.07)        | 0.457          |

**eTable 7. Linear mixed models were fitted with education, age, sex, genetic status (non-carrier vs carrier) and the CDR+NACC-FTLD sum of boxes as fixed effects and pedigree as random effect to investigate the association between *TMEM106B* rs1990622 and the outcome measures total gray matter volume and UDS3-EF in affected individuals**

|                       | <i>Total gray matter volume<br/>N = 536</i> |                | <i>UDS3-EF<br/>N = 1113</i> |                |
|-----------------------|---------------------------------------------|----------------|-----------------------------|----------------|
|                       | <b>Coeff (95% CI)</b>                       | <b>P value</b> | <b>Coeff (95% CI)</b>       | <b>P value</b> |
| TMEM106B<br>Additive  | 0.01 (-0.44, 0.47)                          | 0.596          | 0.04<br>(-0.05, 0.13)       | 0.338          |
| TMEM106B<br>Recessive | -0.05 (-0.89, 0.79)                         | 0.910          | 0.04<br>(-0.11, 0.20)       | 0.590          |

**eTable 8. Linear mixed model statistics for *TMEM106B* rs1990622 on individual gray matter regions of interest in *GRN* carriers with  $p < 0.05$  in the recessive model, after controlling for years of education, sex, age at visit, and CDR+NACC-FTLD SB as fixed effects and pedigree as random effect.**

|                                 | <b>Coeff (95% CI)</b> | <b>P value</b> |
|---------------------------------|-----------------------|----------------|
| Left thalamus                   | 0.03 (0.01,0.06)      | 0.006          |
| Right cerebellum                | 0.24 (0.04,0.43)      | 0.020          |
| Left cerebellum                 | 0.23 (0.02,0.43)      | 0.035          |
| Left rostral anterior cingulate | 0.011 (0.0007,0.02)   | 0.040          |
| Right thalamus                  | 0.03 (0.001,0.05)     | 0.044          |

**eTable 9. Linear mixed model statistics for *TMEM106B* rs1990622 on individual gray matter regions of interest in presymptomatic *GRN* carriers with  $p < 0.05$  in the recessive model, after controlling for years of education, sex and age at visit as fixed effects and pedigree as random effect**

|                       | <b>Coeff (95% CI)</b> | <b>P value</b> |
|-----------------------|-----------------------|----------------|
| Left thalamus         | 0.03 (0.01,0.05)      | 0.003          |
| Right cerebellum      | 0.26 (0.08,0.44)      | 0.008          |
| Right insular cortex  | 0.02 (0.008,0.04)     | 0.008          |
| Left temporal cortex  | 0.17 (0.04,0.30)      | 0.013          |
| Right frontal cortex  | 0.25 (0.07,0.44)      | 0.014          |
| Right temporal cortex | 0.15 (0.03,0.28)      | 0.024          |
| Left frontal cortex   | 0.24 (0.04,0.43)      | 0.025          |
| Right thalamus        | 0.03 (0.004,0.05)     | 0.029          |
| Left cerebellum       | 0.26 (0.03,0.49)      | 0.032          |

**eTable 10. Longitudinal linear mixed statistics for the association of *TMEM106B* rs1990622 with UDS-3 in presymptomatic *C9orf72* carriers**

|                           | <b>Additive</b>       |                | <b>Recessive</b>      |                |
|---------------------------|-----------------------|----------------|-----------------------|----------------|
|                           | <b>Coeff (95% CI)</b> | <b>P value</b> | <b>Coeff (95% CI)</b> | <b>P value</b> |
| <i>TMEM106B</i> rs1990622 | 0.22 (0.05, 0.39)     | <b>0.014</b>   | 0.45 (0.13, 0.78)     | <b>0.008</b>   |
| Time since baseline       | 0.06 (0.0001, 0.12)   | 0.06           | 0.06 (-0.001, 0.12)   | 0.07           |
| Education                 | 0.05 (-0.003, 0.11)   | 0.06           | 0.05 (-0.003, 0.11)   | 0.05           |
| Sex (female)              | -0.003 (-0.25, 0.25)  | 0.98           | -0.03 (-0.27, 0.22)   | 0.82           |
| Age at baseline           | -0.02 (-0.03, -0.01)  | <b>0.0003</b>  | -0.02 (-0.03, -0.10)  | <b>0.0003</b>  |
